# Supplementary material for: Loss of CPAP causes sustained EGFR signaling and epithelial-mesenchymal transition in oral cancer
Source: PubMed Central journal article supplement (PMC8057274; doi:10.18632/oncotarget.27932), 2021-04-13
Supplement: oncotarget-12-807-s001.pdf [file oncotarget-12-807-s001.pdf]

## Loss of CPAP causes sustained EGFR signaling and epithelial-mesenchymal transition in oral cancer

### SUPPLEMENTARY MATERIALS

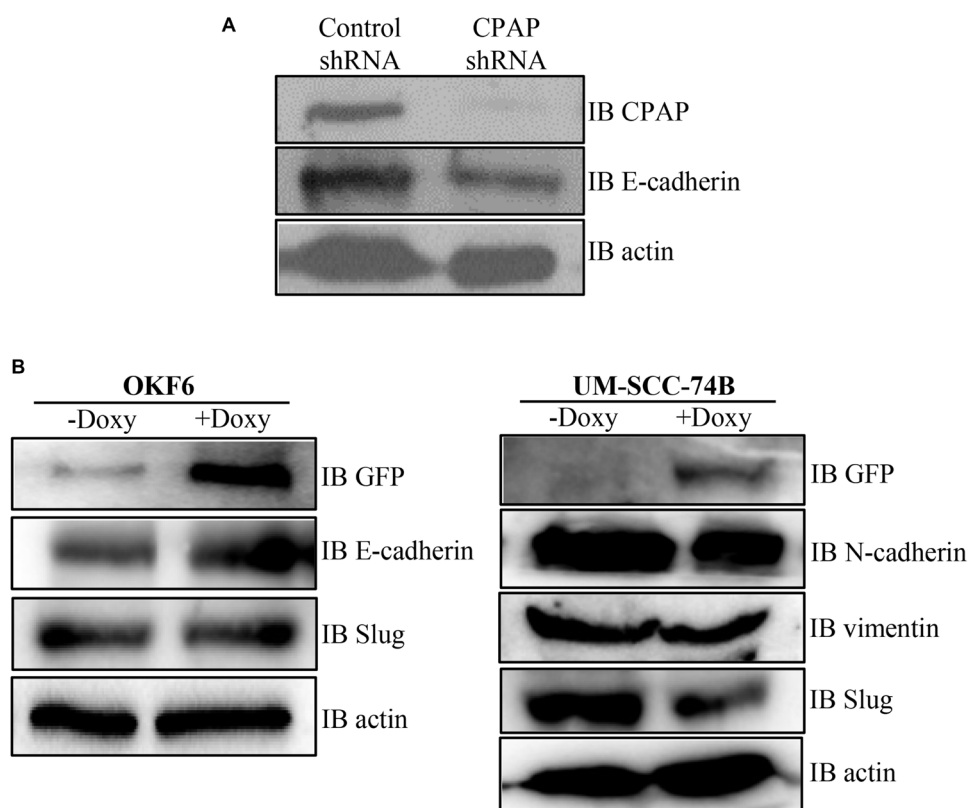

**Supplementary Figure 1: EMT marker expression levels in CPAP-depleted and -overexpressing cells.** (A) IB showing protein levels of E-cadherin along with CPAP and  $\beta$ -actin in OKF6 cells that are stably expressing control-shRNA and CPAP-shRNA. (B) OKF6 and UM-SCC-74B cells that are stably expressing GFP-CPAP (under doxy-inducible promoter) vector were left untreated (-doxy) or exposed to doxycycline (+doxy) for 24 h and subjected to IB for detecting various EMT markers along with GFP (CPAP) and  $\beta$ -actin.

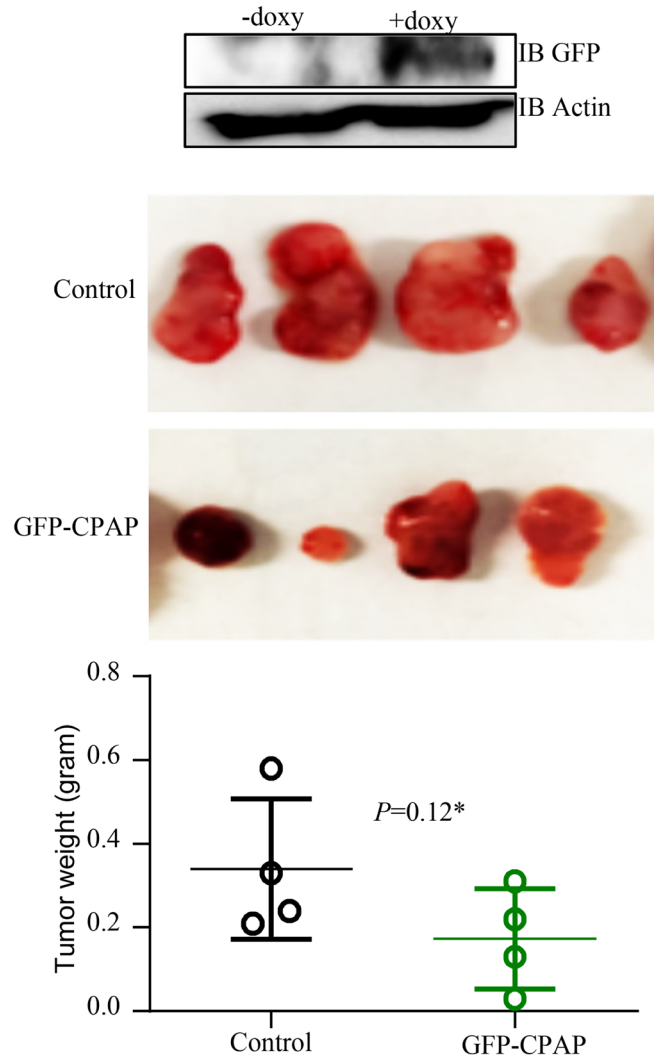

**Supplementary Figure 2: CPAP overexpression enhances tumorigenic property of OSCC cells.** UM-SCC-74B cells stably expressing control vector or GFP-CPAP (under doxy-inducible promoter) vector or control vector were generated. GFP expression/CPAP overexpression after 24 h post doxy treatment was confirmed by IB of untreated and doxy-treated GFP-CPAP cells (upper panel). Control and GFP-CPAP cells were s.c. injected to the flank of nude mice (4 mice/group). Day 24 post-injection, tumors were harvested and weighed. Tumors (middle panel) and mean  $\pm$  SD of tumor weights (lower panel) are shown. *P*-value by two-tailed, unpaired Mann-Whitney test. \*denotes not significant.

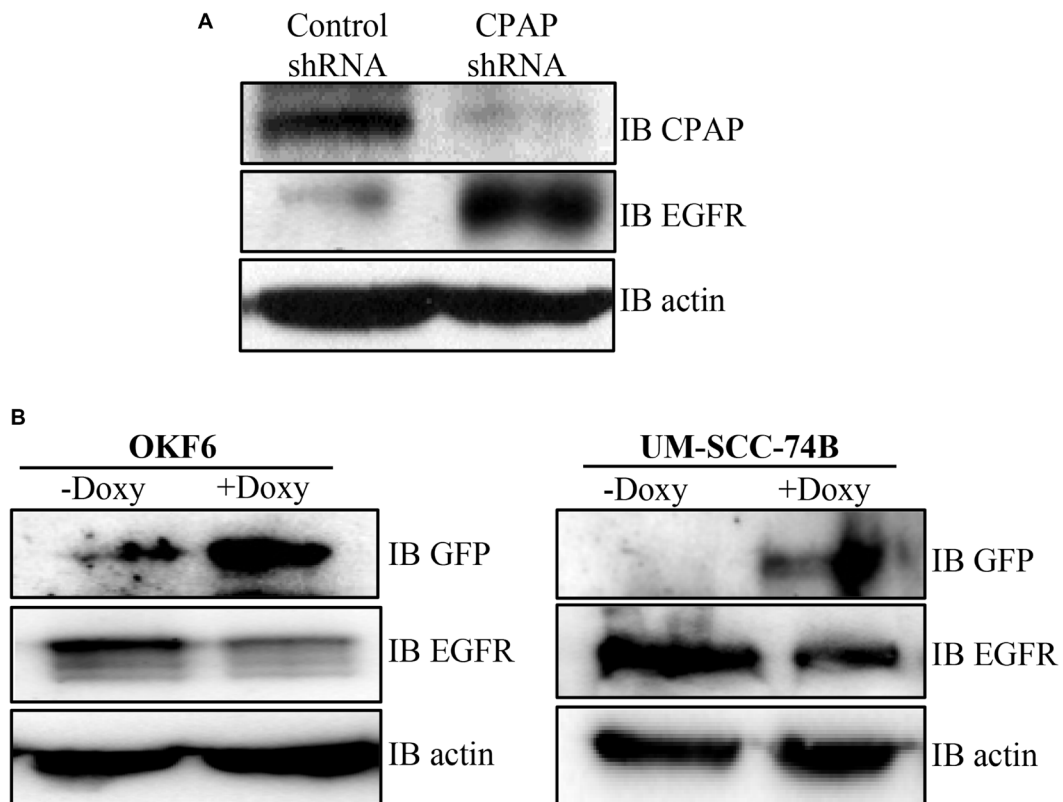

**Supplementary Figure 3: EGFR expression levels in CPAP-depleted and -overexpressing cells.** (A) IB showing protein levels of EGFR along with CPAP and  $\beta$ -actin in OKF6 cells that are stably expressing control-shRNA and CPAP-shRNA. (B) OKF6 and UM-SCC-74B cells that are stably expressing GFP-CPAP (under doxy-inducible promoter) vector were left untreated (-doxy) or exposed to doxycycline (+doxy) for 24 h and subjected to IB for detecting EGFR along with GFP (CPAP) and  $\beta$ -actin.

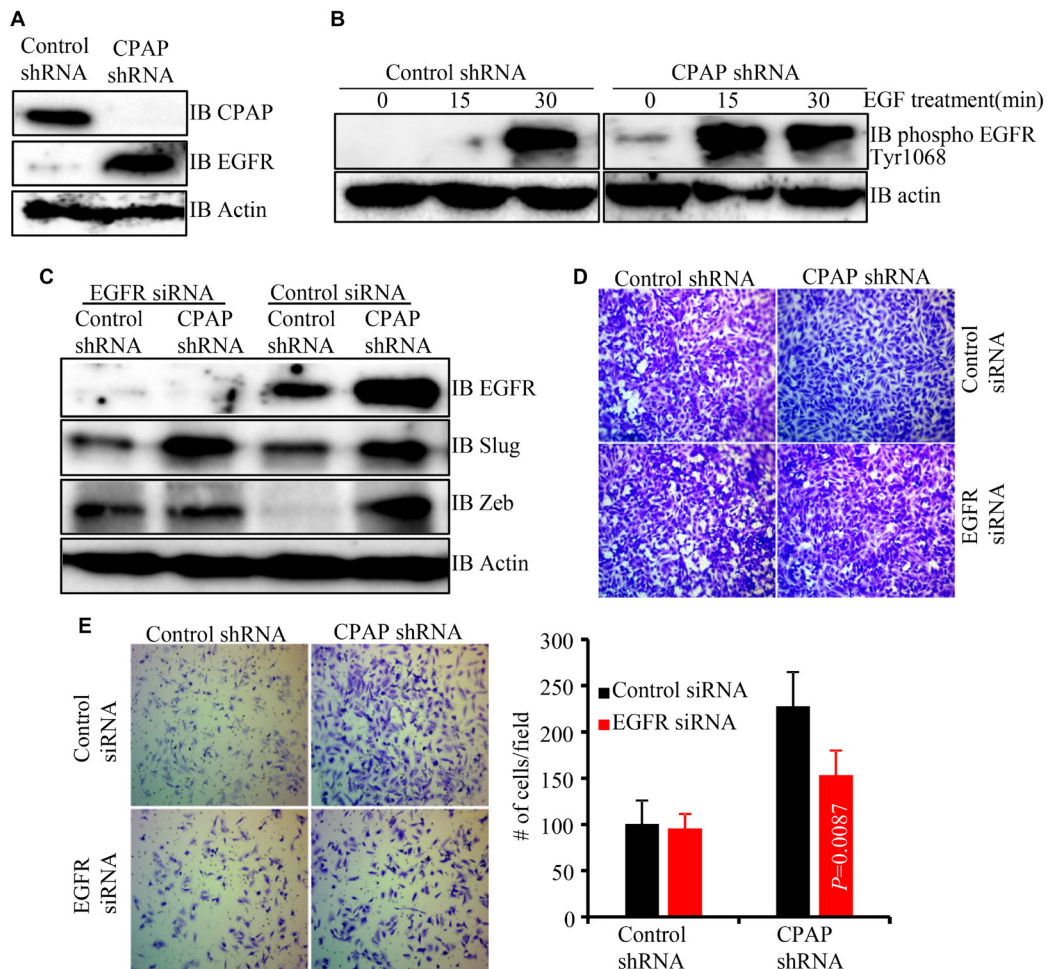

**Supplementary Figure 4: CPAP depletion causes an increase in cellular levels of total and phospho-EGFR proteins, and EGF treatment enhances EMT-like features, in UM-SCC-74A cells.** (A) UM-SCC-74A cells that are stably expressing control shRNA or CPAP shRNA were subjected to IB to detect total EGFR and  $\beta$ -actin proteins. (B) These cells were maintained in serum-free media overnight, treated with cycloheximide for 1 h and treated with EGF (30 ng/ml), and incubated at 37°C for indicated durations to induce signaling. Levels of phosphorylated EGFR (Tyr1068) were detected in protein equalized cell lysates by IB. (C) Cells were subjected to IB to detect EMT associated transcription factors Slug and Zeb along with EGFR and  $\beta$ -actin. Equal number of each cell types were also subjected to migration and matrigel-invasion assay using the transwell approach and imaged. (D) Representative fields of migrated cells on insert membranes with no matrigel coating are shown. (E) Representative fields of invasive cells on membranes with matrigel coating (left) and average number (mean  $\pm$  SD) of cells of at least 5 fields/group (right) are shown. Representative results from one of the three independent experiments are shown. *P*-values by two-tailed, unpaired Mann-Whitney test.
